# Supplementary material
Source: PubMed Central journal article supplement (PMC5880520)

## Online Data Supplement

### Isoniazid-Monoresistance and Rate of Culture Conversion among Confirmed Tuberculosis Patients in the State of Georgia, 2009 – 2014

Argita D Salindri, Rose-Marie F Sales, Lauren DiMiceli, Marcos C Schechter, Russell R Kempker, Matthew J Magee

| <b>Supplemental Tables</b>                                                                                                                                                                                                      | <b>Page</b> |
|---------------------------------------------------------------------------------------------------------------------------------------------------------------------------------------------------------------------------------|-------------|
| Supplemental Table 1. Comparison between clinical TB and culture-confirmed TB patients in the state of Georgia, 2009 – 2014 (N=2049) .....                                                                                      | 2           |
| Supplemental Table 2. Univariate and multivariate models for odds of INH-monoresistant TB among adult patients with pulmonary TB, Georgia, 2009 – 2014 (N=1141) .....                                                           | 3           |
| Supplemental Table 3. Multivariable models for cause-specific proportional hazard among adult patients with pulmonary TB, Georgia, 2009 – 2014 (N=1116) .....                                                                   | 4           |
| <br><b>Appendix Tables</b>                                                                                                                                                                                                      |             |
| Appendix Table 1. Unadjusted and adjusted odds ratios for poor final TB treatment outcome among patients with culture-confirmed TB in the state of Georgia, USA, 2009 – 2014 (N=1087) .....                                     | 7           |
| Appendix Table 2. Covariate selection sensitivity analyses of multivariable hazard models for sputum culture conversion among adult patients with pulmonary TB, Georgia, 2009 – 2014 (N=1116) .....                             | 9           |
| Appendix Table 3. Effect modification between INH-monoresistant TB and key characteristics of patients with culture-confirmed TB in the state of Georgia, USA, 2009 – 2014 (N=1116) .....                                       | 10          |
| Appendix Table 4. Sensitivity analysis of externally adjusted odds ratios for poor TB treatment outcomes and all-cause mortality during TB treatment comparing patients with and without INH-monoresistance ( $OR_{DX}$ ) ..... | 12          |

Supplemental Table 1. Comparison between clinical TB and culture-confirmed TB patients in the state of Georgia, 2009 – 2014 (N=2049)

| Characteristics           | Clinical TB <sup>†</sup><br>N (%) = 863<br>(42.1)<br>N (%) | Culture-confirmed<br>TB<br>N (%) = 1186 (57.9)<br>N (%) | Total<br>N = 2049<br>N (%) | P-value <sup>‡</sup> |
|---------------------------|------------------------------------------------------------|---------------------------------------------------------|----------------------------|----------------------|
| Age                       |                                                            |                                                         |                            |                      |
| 15 – 24                   | 87 (10.1)                                                  | 140 (11.8)                                              | 227 (11.1)                 | 0.02*                |
| 25 – 44                   | 322 (37.3)                                                 | 438 (36.9)                                              | 760 (37.1)                 |                      |
| 45 – 64                   | 296 (34.3)                                                 | 447 (37.7)                                              | 743 (36.3)                 |                      |
| ≥ 65                      | 158 (18.3)                                                 | 161 (13.6)                                              | 319 (15.6)                 |                      |
| Gender                    |                                                            |                                                         |                            |                      |
| Female                    | 330 (38.2)                                                 | 347 (29.3)                                              | 677 (33.0)                 | <0.001*              |
| Male                      | 533 (61.8)                                                 | 839 (70.7)                                              | 1372 (67.0)                |                      |
| Race                      |                                                            |                                                         |                            |                      |
| White, Non-Hispanic       | 122 (14.3)                                                 | 173 (14.7)                                              | 295 (14.6)                 | 0.01*                |
| Black, Non-Hispanic       | 413 (48.5)                                                 | 580 (49.3)                                              | 993 (48.9)                 |                      |
| Hispanic, all races       | 131 (15.4)                                                 | 225 (19.1)                                              | 356 (17.6)                 |                      |
| Asian, Non-Hispanic       | 186 (21.8)                                                 | 198 (16.8)                                              | 384 (18.9)                 |                      |
| Missing                   | 11                                                         | 10                                                      | 21                         |                      |
| Foreign Born              |                                                            |                                                         |                            |                      |
| No                        | 440 (51.0)                                                 | 648 (54.6)                                              | 1088 (53.1)                | 0.10                 |
| Yes                       | 423 (49.0)                                                 | 538 (45.4)                                              | 961 (46.9)                 |                      |
| Occupation                |                                                            |                                                         |                            |                      |
| Employed                  | 326 (38.5)                                                 | 487 (41.6)                                              | 813 (40.3)                 | 0.14                 |
| Unemployed                | 322 (38.0)                                                 | 450 (38.4)                                              | 772 (38.2)                 |                      |
| Ineligible for employment | 199 (23.5)                                                 | 235 (20.1)                                              | 434 (21.5)                 |                      |
| Missing                   | 16                                                         | 14                                                      | 30                         |                      |
| Homelessness              |                                                            |                                                         |                            |                      |
| No                        | 805 (93.7)                                                 | 1013 (85.5)                                             | 1818 (88.9)                | <0.001*              |
| Yes                       | 54 (6.3)                                                   | 172 (14.5)                                              | 226 (11.1)                 |                      |
| Missing                   | 4                                                          | 1                                                       | 5                          |                      |
| Illicit Drug Use          |                                                            |                                                         |                            |                      |
| No                        | 795 (93.6)                                                 | 1038 (87.8)                                             | 1833 (90.3)                | <0.001*              |
| Yes                       | 54 (6.4)                                                   | 144 (12.2)                                              | 198 (9.8)                  |                      |
| Missing                   | 14                                                         | 4                                                       | 18                         |                      |
| HIV Status                |                                                            |                                                         |                            |                      |
| Negative                  | 700 (88.4)                                                 | 980 (86.7)                                              | 1680 (87.4)                | 0.26                 |
| Positive                  | 92 (11.6)                                                  | 151 (13.4)                                              | 243 (12.6)                 |                      |
| Missing                   | 71                                                         | 55                                                      | 126                        |                      |
| Diabetes Status           |                                                            |                                                         |                            |                      |
| Negative                  | 739 (89.0)                                                 | 998 (86.7)                                              | 1737 (87.7)                | 0.12                 |
| Positive                  | 91 (11.0)                                                  | 153 (13.3)                                              | 244 (12.3)                 |                      |
| Missing                   | 33                                                         | 35                                                      | 68                         |                      |

Abbreviations: HIV – human immunodeficiency virus;

<sup>†</sup>Including patients with missing culture results

<sup>‡</sup>Chi square or Fisher's exact test p-value

\*Indicates that the finding is statistically significant at level of confidence of 5% (P-value 0.05)

Supplemental Table 2. Univariate and multivariable models for odds of INH-mono-resistant TB among adult patients with pulmonary TB, Georgia, 2009 – 2014 (N=1141)

| Models                                               | Odds Ratios (95% Confidence Interval) | P-value | Covariates included in the model                                                                                                                                           |
|------------------------------------------------------|---------------------------------------|---------|----------------------------------------------------------------------------------------------------------------------------------------------------------------------------|
| Crude<br>HIV Negative<br>HIV Positive                | 1.00<br>3.14 (2.04 – 4.76)*           | <0.001  | N/A                                                                                                                                                                        |
| Model 1<br>HIV Negative<br>HIV Positive              | 1.00<br>1.46 (0.75 – 2.65)            | 0.23    | HIV and genotype                                                                                                                                                           |
| Model 2 <sup>†</sup><br>HIV Negative<br>HIV Positive | 1.00<br>1.85 (1.08 – 3.13)*           | 0.02    | Age, gender, race, foreign born, occupation, homelessness, TB history, illicit drug use, HIV status, diabetes, cavitory disease, and miliary disease                       |
| Model 3<br>HIV Negative<br>HIV Positive              | 1.00<br>1.57 (0.75 – 3.13)            | 0.22    | Age, gender, race, foreign born, occupation, homelessness, TB history, illicit drug use, HIV status, diabetes, cavitory disease, miliary disease, and genotype information |

<sup>†</sup>Model reported in manuscript

\*Indicates that the finding is statistically significant at level of confidence of 5% (P-value 0.05)

Supplemental Table 3. Multivariable models for cause-specific proportional hazard among adult patients with pulmonary TB, Georgia, 2009 – 2014 (N=1116)

| Characteristics                                   | Converted<br>956/1116 <sup>†</sup><br>(85.7%)<br>N % | Median<br>(IQR) <sup>‡</sup><br>30 (13 – 58) | Conventional Cox Proportional<br>Hazards Model |                    | Cause-Specific Hazard Model |                    |                           |                    |  |
|---------------------------------------------------|------------------------------------------------------|----------------------------------------------|------------------------------------------------|--------------------|-----------------------------|--------------------|---------------------------|--------------------|--|
|                                                   |                                                      |                                              | aHR <sup>§</sup> (95% CI)                      | p-value<br>for aHR | Culture Conversion          |                    | Death                     |                    |  |
|                                                   |                                                      |                                              |                                                |                    | aHR <sup>§</sup> (95% CI)   | p-value<br>for aHR | aHR <sup>§</sup> (95% CI) | p-value<br>for aHR |  |
| INH-mono-resistance                               |                                                      |                                              |                                                |                    |                             |                    |                           |                    |  |
| No                                                | 826/976 (84.6)                                       | 32 (13 – 59)                                 | 1.00                                           |                    | 1.00                        |                    | 1.00                      |                    |  |
| Yes                                               | 130/140 (92.9)                                       | 27 (10 – 51)                                 | 1.15 (0.95 – 1.39)                             | 0.16               | 1.15 (0.95 – 1.40)          | 0.17               | 1.40 (0.59 – 3.28)        | 0.45               |  |
| Age                                               |                                                      |                                              |                                                |                    |                             |                    |                           |                    |  |
| 15 – 24                                           | 107/131 (81.7)                                       | 27 (12 – 50)                                 | 1.00                                           |                    | 1.00                        |                    | 1.00                      |                    |  |
| 25 – 44                                           | 360/412 (87.4)                                       | 26 (11 – 53)                                 | 0.98 (0.79 – 1.23)                             | 0.89               | 1.01 (0.81 – 1.26)          | 0.93               | 0.40 (0.07 – 2.19)        | 0.29               |  |
| 45 – 64                                           | 376/422 (87.0)                                       | 39 (14 – 64)                                 | 0.84 (0.67 – 1.05)                             | 0.12               | 0.80 (0.64 – 1.00)*         | 0.049              | 2.80 (0.65 – 12.02)       | 0.16               |  |
| ≥ 65                                              | 122/151 (80.8)                                       | 33 (14 – 57)                                 | 1.01 (0.77 – 1.32)                             | 0.94               | 0.90 (0.68 – 1.19)          | 0.45               | 6.28 (1.40 – 28.10)*      | 0.02               |  |
| Gender                                            |                                                      |                                              |                                                |                    |                             |                    |                           |                    |  |
| Female                                            | 289/325 (88.9)                                       | 29 (13 – 55)                                 | 1.00                                           |                    | 1.00                        |                    | 1.00                      |                    |  |
| Male                                              | 667/791 (84.3)                                       | 32 (13 – 59)                                 | 0.93 (0.81 – 1.07)                             | 0.31               | 0.91 (0.79 – 1.05)          | 0.18               | 1.79 (0.85 – 3.77)        | 0.12               |  |
| Race                                              |                                                      |                                              |                                                |                    |                             |                    |                           |                    |  |
| White, Non-Hispanic                               | 136/159 (85.5)                                       | 46 (17 – 81)                                 |                                                |                    |                             |                    |                           |                    |  |
| Black, Non-Hispanic                               | 482/556 (86.7)                                       | 31 (13 – 56)                                 |                                                |                    |                             |                    |                           |                    |  |
| Hispanic, all races                               | 163/208 (78.4)                                       | 33 (13 – 56)                                 |                                                |                    |                             |                    |                           |                    |  |
| Asian, Non-Hispanic                               | 165/183 (90.2)                                       | 25 (10 – 48)                                 |                                                |                    |                             |                    |                           |                    |  |
| Foreign born                                      |                                                      |                                              |                                                |                    |                             |                    |                           |                    |  |
| No                                                | 532/617 (86.2)                                       | 35 (13 – 62)                                 |                                                |                    |                             |                    |                           |                    |  |
| Yes                                               | 424/499 (85.0)                                       | 28 (13 – 53)                                 |                                                |                    |                             |                    |                           |                    |  |
| Occupation                                        |                                                      |                                              |                                                |                    |                             |                    |                           |                    |  |
| Employed                                          | 408/454 (89.9)                                       | 32 (14 – 58)                                 |                                                |                    |                             |                    |                           |                    |  |
| Unemployed                                        | 367/424 (86.6)                                       | 30 (11 – 56)                                 |                                                |                    |                             |                    |                           |                    |  |
| Ineligible for<br>employment, student,<br>retired | 176/226 (77.9)                                       | 34 (13 – 66)                                 |                                                |                    |                             |                    |                           |                    |  |
| Homelessness                                      |                                                      |                                              |                                                |                    |                             |                    |                           |                    |  |
| No                                                | 813/952 (85.4)                                       | 31 (12 – 59)                                 | 1.00                                           |                    | 1.00                        |                    | 1.00                      |                    |  |
| Yes                                               | 142/163 (87.1)                                       | 30 (14 – 55)                                 | 1.19 (0.98 – 1.44)                             | 0.08               | 1.22 (1.00 – 1.48)*         | 0.049              | 0.68 (0.29 – 1.62)        | 0.39               |  |
| History of                                        |                                                      |                                              |                                                |                    |                             |                    |                           |                    |  |

| Characteristics                                          | Converted<br>956/1116 <sup>†</sup><br>(85.7%)<br>N % | Median<br>(IQR) <sup>‡</sup><br>30 (13 – 58) | Conventional Cox Proportional<br>Hazards Model |                    | Cause-Specific Hazard Model |                    |                             |                    |
|----------------------------------------------------------|------------------------------------------------------|----------------------------------------------|------------------------------------------------|--------------------|-----------------------------|--------------------|-----------------------------|--------------------|
|                                                          |                                                      |                                              | aHR <sup>§</sup> (95% CI)                      | p-value<br>for aHR | Culture Conversion          |                    | Death                       |                    |
|                                                          |                                                      |                                              |                                                |                    | aHR <sup>§</sup> (95% CI)   | p-value<br>for aHR | aHR <sup>§</sup> (95% CI)   | p-value<br>for aHR |
| imprisonment<br>No<br>Yes                                | 901/1037 (86.9)<br>51/55 (92.7)                      | 32 (13 – 59)<br>22 (6 – 45)                  |                                                |                    |                             |                    |                             |                    |
| Resident of Long Term<br>Care Facility<br>No<br>Yes      | 946/1100 (86.0)<br>9/15 (60.0)                       | 31 (13 – 58)<br>28 (22 – 33)                 |                                                |                    |                             |                    |                             |                    |
| TB History<br>No<br>Yes                                  | 900/1052 (85.6)<br>56/64 (87.5)                      | 31 (13 – 58)<br>24 (8 – 60)                  |                                                |                    |                             |                    |                             |                    |
| Illicit drug use<br>No<br>Yes                            | 834/974 (85.6)<br>120/138 (87.0)                     | 32 (13 – 58)<br>26 (11 – 58)                 |                                                |                    |                             |                    |                             |                    |
| Alcohol abuse<br>No<br>Yes                               | 771/902 (85.5)<br>181/208 (87.0)                     | 30 (12 – 58)<br>33 (15 – 58)                 |                                                |                    |                             |                    |                             |                    |
| HIV Status<br>Negative<br>Positive<br>Missing            | 808/925 (87.4)<br>122/141 (86.5)<br>26/50 (52.0)     | 34 (14 – 59)<br>18 (8 – 39)<br>30 (10 – 64)  | 1.00<br>1.23 (1.01 – 1.50)*                    | 0.042              | 1.00<br>1.14 (0.92 – 1.40)  | 0.22               | 1.00<br>4.15 (1.98 – 8.71)* | <0.001             |
| Diabetes Status<br>No<br>Yes<br>Missing                  | 812/940 (86.9)<br>121/142 (85.2)<br>23/34 (67.7)     | 29 (12 – 56)<br>51 (27 – 65)<br>25 (2 – 59)  | 1.00<br>0.88 (0.73 – 1.07)                     | 0.19               | 1.00<br>0.87 (0.71 – 1.06)  | 0.16               | 1.00<br>1.17 (0.56 – 2.48)  | 0.68               |
| History of LTBI<br>Prophylaxis<br>No<br>Yes              | 893/1039 (86.0)<br>40/43 (93.0)                      | 30 (13 – 58)<br>36 (20 – 57)                 |                                                |                    |                             |                    |                             |                    |
| Baseline TST<br>Negative<br>Positive<br>Not Done/Missing | 202/236 (85.6)<br>471/523 (90.1)<br>283/357 (79.3)   | 35 (18 – 64)<br>32 (13 – 58)<br>28 (10 – 52) | 1.00<br>1.13 (0.96 – 1.34)                     | 0.15               | 1.00<br>1.14 (0.96 – 1.36)  | 0.13               | 1.00<br>0.58 (0.24 – 1.42)  | 0.23               |

| Characteristics                                                   | Converted<br>956/1116 <sup>†</sup><br>(85.7%)<br>N % | Median<br>(IQR) <sup>‡</sup><br>30 (13 – 58) | Conventional Cox Proportional<br>Hazards Model |                    | Cause-Specific Hazard Model |                    |                            |                    |
|-------------------------------------------------------------------|------------------------------------------------------|----------------------------------------------|------------------------------------------------|--------------------|-----------------------------|--------------------|----------------------------|--------------------|
|                                                                   |                                                      |                                              | aHR <sup>§</sup> (95% CI)                      | p-value<br>for aHR | Culture Conversion          |                    | Death                      |                    |
|                                                                   |                                                      |                                              |                                                |                    | aHR <sup>§</sup> (95% CI)   | p-value<br>for aHR | aHR <sup>§</sup> (95% CI)  | p-value<br>for aHR |
| Baseline Smear<br>Negative<br>Positive                            | 290/348 (83.3)<br>665/762 (87.3)                     | 14 (1 – 38)<br>39 (19 – 63)                  | 1.00<br>0.65 (0.5 – 0.75)*                     | <0.001             | 1.00<br>0.60 (0.52 – 0.69)* | <0.001             | 1.00<br>1.79 (0.92 – 3.48) | 0.09               |
| Baseline CXR<br>Reading<br>Normal<br>Abnormal                     | 60/68 (88.2)<br>848/980 (86.5)                       | 14 (1 – 45)<br>32 (14 – 59)                  |                                                |                    |                             |                    |                            |                    |
| Cavitary Disease<br>No<br>Yes                                     | 566/671 (84.4)<br>333/370 (90.0)                     | 24 (8 – 50)<br>43 (22 – 65)                  |                                                |                    |                             |                    |                            |                    |
| Miliary Disease<br>No<br>Yes                                      | 868/997 (87.1)<br>26/32 (81.3)                       | 31 (13 – 58)<br>24 (11 – 58)                 |                                                |                    |                             |                    |                            |                    |
| TB Site<br>Pulmonary only<br>Pulmonary +<br>extrapulmonary        | 870/1016 (85.6)<br>86/100 (86.0)                     | 33 (14 – 59)<br>21 (7 – 46)                  |                                                |                    |                             |                    |                            |                    |
| TB Treatment Duration<br>≤ 6 months<br>7-12 months<br>> 12 months | 85/183 (46.5)<br>765/820 (93.3)<br>106/113 (93.8)    | 28 (14 – 48)<br>30 (12 – 57)<br>39 (19 – 77) |                                                |                    |                             |                    |                            |                    |

Abbreviations: IQR – Inter Quartile Range; AHR - Adjusted Hazard Ratio; TB – Tuberculosis; HIV – human immunodeficiency virus; LTBI - Latent Tuberculosis Infection; TST – Tuberculin Skin Test; CXR – Chest X-Ray; INH – Isoniazid;

<sup>†</sup>Patients converted with positive culture at baseline

<sup>‡</sup>Among patients who converted, median time (measured in days) from the initial TB treatment until date of sputum culture conversion

<sup>§</sup>Adjusted hazard ratio after controlling for age, gender, HIV status, diabetes status, TST at baseline, smear status, and INH-mono-resistance

\*Indicates that the finding is statistically significant at level of confidence of 5% (p-value < 0.05)

Appendix Table 1. Unadjusted and adjusted odds ratios for poor final TB treatment outcome among patients with culture-confirmed TB in the state of Georgia, USA, 2009 – 2014 (N=1087)

| Variable                                    | Odds Ratio           |                           |
|---------------------------------------------|----------------------|---------------------------|
|                                             | COR (95% CI)         | AOR (95% CI) <sup>†</sup> |
| INH-monoresistant TB                        |                      |                           |
| No                                          | 1.00                 | 1.00                      |
| Yes                                         | 1.06 (0.59 – 1.80)   | 1.61 (0.67 – 3.70)        |
| Age                                         |                      |                           |
| 15 – 24                                     | 1.00                 | 1.00                      |
| 25 – 44                                     | 1.10 (0.48 – 2.81)   | 0.70 (0.24 – 2.21)        |
| 45 – 64                                     | 2.29 (1.08 – 5.66)*  | 1.48 (0.54 – 4.51)        |
| ≥ 65                                        | 5.67 (2.57 – 14.33)* | 2.84 (0.95 – 9.27)        |
| Gender                                      |                      |                           |
| Female                                      | 1.00                 | 1.00                      |
| Male                                        | 1.58 (1.02 – 2.54)*  | 1.61 (0.84 – 3.19)        |
| Race/Ethnicity                              |                      |                           |
| White, Non-Hispanic                         | 1.00                 |                           |
| Black, Non-Hispanic                         | 1.28 (0.74 – 2.35)   |                           |
| Hispanic, all races                         | 1.13 (0.57 – 2.28)   |                           |
| Asian, Non-Hispanic                         | 0.59 (0.26 – 1.30)   |                           |
| Foreign born                                |                      |                           |
| No                                          | 1.00                 |                           |
| Yes                                         | 0.75 (0.51 – 1.11)   |                           |
| Occupation                                  |                      |                           |
| Employed                                    | 1.00                 |                           |
| Unemployed                                  | 1.93 (1.21 – 3.12)*  |                           |
| Ineligible for employment, student, retired | 2.92 (1.75 – 4.92)*  |                           |
| Homelessness                                |                      |                           |
| No                                          | 1.00                 |                           |
| Yes                                         | 1.00 (0.57 – 1.66)   |                           |
| History of imprisonment                     |                      |                           |
| No                                          | 1.00                 |                           |
| Yes                                         | 0.33 (0.05 – 1.07)   |                           |
| Resident of Long Term Care Facility         |                      |                           |
| No                                          | 1.00                 |                           |
| Yes                                         | 1.65 (0.25 – 6.36)   |                           |
| Contact with TB Patient                     |                      |                           |
| No                                          | 1.00                 |                           |
| Yes                                         | 0.41 (0.17 – 0.84)*  |                           |
| TB History                                  |                      |                           |
| No                                          | 1.00                 |                           |
| Yes                                         | 0.87 (0.33 – 1.90)   |                           |
| Illicit drug use                            |                      |                           |
| No                                          | 1.00                 |                           |
| Yes                                         | 0.93 (0.49 – 1.62)   |                           |
| Alcohol abuse                               |                      |                           |
| No                                          | 1.00                 |                           |
| Yes                                         | 1.62 (1.03 – 2.50)*  |                           |
| HIV Status                                  |                      |                           |

| Variable                   | Odds Ratio           |                           |
|----------------------------|----------------------|---------------------------|
|                            | COR (95% CI)         | AOR (95% CI) <sup>†</sup> |
| Negative                   | 1.00                 | 1.00                      |
| Positive                   | 2.25 (1.37 – 3.60)*  | 3.80 (1.78 – 8.17)*       |
| Diabetes Status            |                      |                           |
| No                         | 1.00                 |                           |
| Yes                        | 1.73 (1.04 – 2.80)*  |                           |
| ESRD                       |                      |                           |
| No                         | 1.00                 |                           |
| Yes                        | 5.18 (1.73 – 14.24)* |                           |
| Baseline TST               |                      |                           |
| Negative                   | 1.00                 |                           |
| Positive                   | 0.40 (0.24 – 0.66)*  |                           |
| Baseline Smear             |                      |                           |
| Negative                   | 1.00                 | 1.00                      |
| Positive                   | 1.23 (0.81 – 1.91)   | 2.83 (1.50 – 5.55)*       |
| Baseline CXR Reading       |                      |                           |
| Normal                     | 1.00                 |                           |
| Abnormal                   | 1.37 (0.63 – 3.62)   |                           |
| Cavitary Disease           |                      |                           |
| No                         | 1.00                 |                           |
| Yes                        | 1.01 (0.66 – 1.51)   |                           |
| Miliary Disease            |                      |                           |
| No                         | 1.00                 |                           |
| Yes                        | 1.64 (0.55 – 4.04)   |                           |
| Site of Disease            |                      |                           |
| Pulmonary                  | 0.38 (0.15 – 1.19)   |                           |
| Pulmonary + extrapulmonary | 0.67 (0.23 – 2.27)   |                           |
| Extrapulmonary only        | 1.00                 |                           |
| Treatment Duration         |                      |                           |
| ≤ 6 months                 | 1.00                 | 1.00                      |
| 7-12 months                | 0.01 (0.01 – 0.02)*  | 0.01 (0.01 – 0.02)*       |
| > 12 months                | 0.02 (0.01 – 0.05)*  | 0.02 (0.01 – 0.04)*       |

<sup>†</sup>Model adjusted for INH-mono-resistant TB, age, gender, HIV status, smear and TB treatment duration

\*Indicates that the finding is statistically significant at level of confidence of 5% (p-value < 0.05)



Appendix Table 2: Covariate selection sensitivity analyses of multivariable hazard models for sputum culture conversion among adult patients with pulmonary TB, Georgia, 2009 – 2014 (N=1116)

| Models                                                              | Hazard Ratio (95% Confidence Interval) | P-value | Covariates included in the model                                                                                                         |
|---------------------------------------------------------------------|----------------------------------------|---------|------------------------------------------------------------------------------------------------------------------------------------------|
| Crude<br>No INH-mono-resistant<br>INH-mono-resistant                | 1.00<br>1.17 (0.97 – 1.41)             | 0.10    | N/A                                                                                                                                      |
| Model 1<br>No INH-mono-resistant<br>INH-mono-resistant              | 1.00<br>1.21 (1.00 – 1.46)*            | 0.046   | Age and gender                                                                                                                           |
| Model 2<br>No INH-mono-resistant<br>INH-mono-resistant              | 1.00<br>1.17 (0.96 – 1.41)             | 0.11    | Age, gender, HIV status, and diabetes status                                                                                             |
| Model 3<br>No INH-mono-resistant<br>INH-mono-resistant              | 1.00<br>1.17 (0.97 – 1.41)             | 0.11    | Age, gender, HIV status, diabetes status, and TST result                                                                                 |
| Model 4<br>No INH-mono-resistant<br>INH-mono-resistant              | 1.00<br>1.14 (0.94 – 1.39)             | 0.19    | Age, gender, HIV status, diabetes status, TST result, and homelessness                                                                   |
| Model 5 <sup>†</sup><br>No INH-mono-resistant<br>INH-mono-resistant | 1.00<br>1.15 (0.94 – 1.39)             | 0.17    | Age, gender, HIV status, diabetes status, TST result, homelessness, and smear status                                                     |
| Model 6<br>No INH-mono-resistant<br>INH-mono-resistant              | 1.00<br>1.08 (0.89 – 1.32)             | 0.44    | Age, gender, HIV status, diabetes status, TST result, homelessness, and cavitary disease                                                 |
| Model 7<br>No INH-mono-resistant<br>INH-mono-resistant              | 1.00<br>1.16 (0.95 – 1.41)             | 0.14    | Age, gender, race, HIV status, diabetes status, TST result, homelessness, and smear status                                               |
| Model 8<br>No INH-mono-resistant<br>INH-mono-resistant              | 1.00<br>1.15 (0.94 – 1.39)             | 0.18    | Age, gender, HIV status, diabetes status, TST result, homelessness, history of imprisonment, and smear status                            |
| Model 9<br>No INH-mono-resistant<br>INH-mono-resistant              | 1.00<br>1.15 (0.94 – 1.40)             | 0.17    | Age, gender, HIV status, diabetes status, TST result, homelessness, history of imprisonment, alcohol, and smear status                   |
| Model 10<br>No INH-mono-resistant<br>INH-mono-resistant             | 1.00<br>1.15 (0.94 – 1.40)             | 0.08    | Age, gender, HIV status, diabetes status, TST result, homelessness, history of imprisonment, alcohol, illicit drug use, and smear status |

<sup>†</sup>Model used in the manuscript

\*Indicates that the finding is statistically significant at level of confidence of 5% (p-value < 0.05)

Appendix Table 3: Effect modification between INH-mono-resistant TB and key characteristic of patients with culture-confirmed TB in the state of Georgia, USA, 2009 – 2014 (N=1116)

| Interaction Covariates |          | INH-mono-resistant TB | Conversion (%) | Hazard Rate <sup>†</sup><br>(95% CI) | Adjusted Hazard <sup>‡</sup><br>Rate (95% CI) |
|------------------------|----------|-----------------------|----------------|--------------------------------------|-----------------------------------------------|
| Gender                 | Female   | No                    | 263/299 (88.0) | 1.00                                 | 1.00                                          |
|                        |          | Yes                   | 26/26 (100.0)  | 1.22 (0.81 – 1.83)                   | 1.03 (0.67 – 1.57)                            |
|                        | Male     | No                    | 563/677 (83.2) | 1.00                                 | 1.00                                          |
|                        |          | Yes                   | 104/114 (91.2) | 1.17 (0.95 – 1.45)                   | 1.14 (0.90 – 1.43)                            |
| Race                   | Other    | No                    | 422/505 (83.6) | 1.00                                 | 1.00                                          |
|                        |          | Yes                   | 50/53 (94.3)   | 1.10 (0.82 – 1.48)                   | 1.12 (0.82 – 1.53)                            |
|                        | Black    | No                    | 402/469 (85.7) | 1.00                                 | 1.00                                          |
|                        |          | Yes                   | 80/87 (92.0)   | 1.22 (0.96 – 1.56)                   | 1.18 (0.91 – 1.53)                            |
| Foreign Born           | No       | No                    | 443/520 (85.2) | 1.00                                 | 1.00                                          |
|                        |          | Yes                   | 89/97 (91.8)   | 1.21 (0.96 – 1.52)                   | 1.14 (0.89 – 1.47)                            |
|                        | Yes      | No                    | 383/456 (84.0) | 1.00                                 | 1.00                                          |
|                        |          | Yes                   | 41/43 (95.4)   | 1.25 (0.90 – 1.73)                   | 1.19 (0.86 – 1.67)                            |
| TB History             | No       | No                    | 779/921 (84.6) | 1.00                                 | 1.00                                          |
|                        |          | Yes                   | 121/131 (12.5) | 1.14 (0.94 – 1.38)                   | 1.12 (0.92 – 0.37)                            |
|                        | Yes      | No                    | 47/55 (85.5)   | 1.00                                 | 1.00                                          |
|                        |          | Yes                   | 9/9 (100.0)    | 1.96 (0.92 – 4.17)                   | 1.05 (0.42 – 2.64)                            |
| Alcohol                | No       | No                    | 668/792 (84.3) | 1.00                                 | 1.00                                          |
|                        |          | Yes                   | 103/110 (93.6) | 1.24 (1.01 – 1.53)*                  | 1.18 (0.95 – 1.48)                            |
|                        | Yes      | No                    | 154/178 (86.5) | 1.00                                 | 1.00                                          |
|                        |          | Yes                   | 27/30 (90.0)   | 0.94 (0.62 – 1.42)                   | 0.88 (0.56 – 1.40)                            |
| Homelessness           | No       | No                    | 741/875 (84.7) | 1.00                                 | 1.00                                          |
|                        |          | Yes                   | 72/77 (93.5)   | 1.03 (0.81 – 1.31)                   | 1.04 (0.81 – 1.33)                            |
|                        | Yes      | No                    | 84/100 (84.0)  | 1.00                                 | 1.00                                          |
|                        |          | Yes                   | 58/63 (92.1)   | 1.51 (1.07 – 2.13)*                  | 1.40 (0.94 – 2.10)                            |
| HIV                    | No       | No                    | 716/828 (86.5) | 1.00                                 | 1.00                                          |
|                        |          | Yes                   | 92/97 (94.9)   | 1.10 (0.89 – 1.37)                   | 1.11 (0.88 – 1.38)                            |
|                        | Yes      | No                    | 87/103 (84.5)  | 1.00                                 | 1.00                                          |
|                        |          | Yes                   | 35/38 (92.1)   | 1.08 (0.73 – 1.60)                   | 1.04 (0.63 – 1.72)                            |
|                        | Missing  | No                    | 23/45 (51.1)   | 1.00                                 |                                               |
|                        |          | Yes                   | 3/5 (60.0)     | 1.39 (0.41 – 4.73)                   |                                               |
| Diabetes               | No       | No                    | 694/813 (85.4) | 1.00                                 | 1.00                                          |
|                        |          | Yes                   | 118/127 (92.9) | 1.18 (0.97 – 1.43)                   | 1.15 (0.94 – 1.42)                            |
|                        | Yes      | No                    | 109/129 (84.5) | 1.00                                 | 1.00                                          |
|                        |          | Yes                   | 12/13 (92.3)   | 0.99 (0.53 – 1.85)                   | 1.01 (0.53 – 1.92)                            |
| TST                    | Negative | No                    | 169/199 (84.9) | 1.00                                 | 1.00                                          |
|                        |          | Yes                   | 33/37 (89.2)   | 1.29 (0.89 – 1.88)                   | 1.29 (0.86 – 1.96)                            |
|                        | Positive | No                    | 415/464 (89.4) | 1.00                                 | 1.00                                          |
|                        |          | Yes                   | 56/59 (94.9)   | 1.28 (0.96 – 1.69)                   | 1.24 (0.92 – 1.67)                            |
| Smear                  | Negative | No                    | 247/303 (81.5) | 1.00                                 | 1.00                                          |
|                        |          | Yes                   | 43/45 (95.6)   | 1.40 (1.01 – 1.94)*                  | 1.25 (0.88 – 1.79)                            |
|                        | Positive | No                    | 578/667 (86.7) | 1.00                                 | 1.00                                          |
|                        |          | Yes                   | 87/95 (91.6)   | 1.07 (0.86 – 1.34)                   | 0.99 (0.78 – 1.26)                            |

<sup>†</sup>Variables included in the model were INH-mono-resistant TB and interaction term

<sup>‡</sup>Model adjusted for age, gender, homelessness, HIV status, DM status, TST result, and smear

result at baseline

\*Indicates that the finding is statistically significant at level of confidence of 5% ( $p$ -value  $< 0.05$ )

Appendix Table 4. Sensitivity analysis of externally adjusted odds ratios for poor TB treatment outcomes and all-cause mortality during TB treatment comparing patients with and without INH-monoresistance ( $OR_{DX}$ )

| $P_{Z1}$ | $P_{Z0}$ | $OR_{XZ}$ | Various $OR_{DX}$<br>(Poor TB treatment Outcome) |      |      |      |      | Various $OR_{DX}$<br>(All-cause Mortality) |      |      |      |      |
|----------|----------|-----------|--------------------------------------------------|------|------|------|------|--------------------------------------------|------|------|------|------|
|          |          |           | $OR_{DZ}$                                        |      |      |      |      | $OR_{DZ}$                                  |      |      |      |      |
|          |          |           | 1.5                                              | 2    | 3    | 4    | 5    | 1.5                                        | 2    | 3    | 4    | 5    |
| 0.167    | 0.038    | 5.075     | 0.99                                             | 0.94 | 0.85 | 0.78 | 0.73 | 1.03                                       | 0.97 | 0.88 | 0.81 | 0.75 |
| 0.072    | 0.001    | 77.799    | 1.02                                             | 0.99 | 0.93 | 0.87 | 0.82 | 1.05                                       | 1.02 | 0.95 | 0.90 | 0.85 |
| 0.086    | 0.027    | 3.450     | 1.03                                             | 1.00 | 0.95 | 0.91 | 0.87 | 1.06                                       | 1.03 | 0.98 | 0.94 | 0.90 |
| 0.112    | 0.037    | 3.260     | 1.02                                             | 0.99 | 0.93 | 0.88 | 0.84 | 1.05                                       | 1.02 | 0.96 | 0.91 | 0.87 |
| 0.155    | 0.057    | 3.022     | 1.01                                             | 0.97 | 0.90 | 0.85 | 0.80 | 1.04                                       | 1.00 | 0.93 | 0.87 | 0.83 |
| 0.064    | 0.091    | 0.685     | 1.07                                             | 1.08 | 1.11 | 1.13 | 1.15 | 1.10                                       | 1.12 | 1.14 | 1.16 | 1.18 |
| 0.154    | 0.020    | 8.836     | 0.99                                             | 0.93 | 0.84 | 0.77 | 0.71 | 1.02                                       | 0.96 | 0.87 | 0.79 | 0.73 |
| 0.160    | 0.090    | 1.928     | 1.02                                             | 0.99 | 0.95 | 0.91 | 0.88 | 1.05                                       | 1.02 | 0.97 | 0.94 | 0.90 |
| 0.123    | 0.094    | 1.347     | 1.04                                             | 1.03 | 1.01 | 0.99 | 0.98 | 1.08                                       | 1.06 | 1.04 | 1.02 | 1.01 |
| 0.119    | 0.066    | 1.912     | 1.03                                             | 1.01 | 0.97 | 0.93 | 0.91 | 1.06                                       | 1.04 | 1.00 | 0.96 | 0.93 |
| 0.046    | 0.019    | 2.488     | 1.04                                             | 1.03 | 1.01 | 0.98 | 0.96 | 1.08                                       | 1.06 | 1.04 | 1.01 | 0.99 |

Note:

$P_{Z1}$ = proportion of TB treatment change among patients with INH-monoresistant TB

$P_{Z0}$ = proportion of TB treatment change among patients with drug-susceptible TB

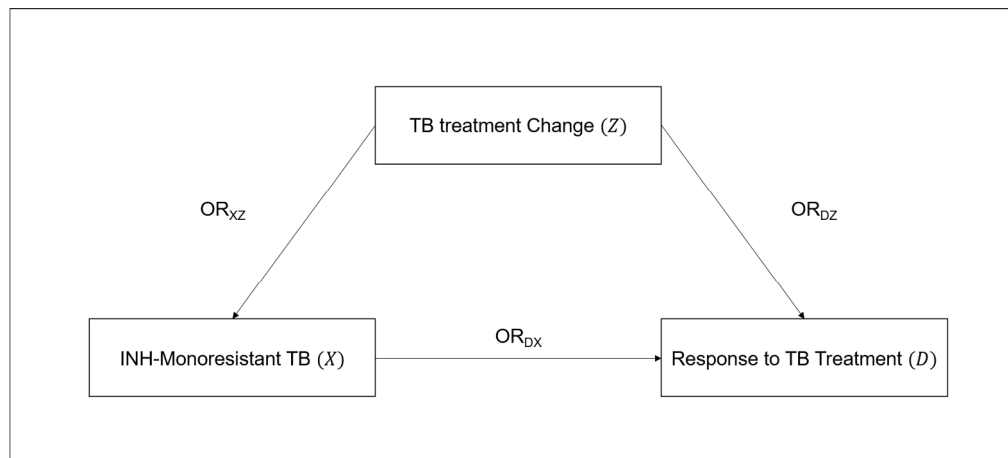

Supplement: AnnalsATS.201702-147OC_salindri_data_supplement.pdf [file AnnalsATS.201702-147OC_salindri_data_supplement.pdf]
